# Supplementary material
Source: PubMed Central journal article supplement (PMC3005140)
Supplement: NIHMS232450-supplement-01.pdf [file NIHMS232450-supplement-01.pdf]

**Supplemental Table 1:** *XRCC1* SNP description, genotypic frequencies, and association with ALS – New England ALS Study\*

| SNP       | Position | Alleles<br>(major/minor) | Genotypic frequencies |      |      |          |      |      | OR (95% CI)†  |
|-----------|----------|--------------------------|-----------------------|------|------|----------|------|------|---------------|
|           |          |                          | Cases                 |      |      | Controls |      |      |               |
|           |          |                          | XX                    | Xy   | yy   | XX       | Xy   | yy   |               |
| rs25487   | 48747566 | G/A                      | 0.46                  | 0.38 | 0.16 | 0.26     | 0.53 | 0.21 | 0.4 (0.2-1.0) |
| rs25489   | 48748252 | G/A                      | 0.91                  | 0.09 | 0    | 0.95     | 0.05 | 0    | 2.0 (0.4-20)  |
| rs915927  | 48749067 | A/G                      | 0.31                  | 0.47 | 0.20 | 0.44     | 0.46 | 0.10 | 1.7 (0.7-3.8) |
| rs1799782 | 48749414 | C/T                      | 0.88                  | 0.12 | 0    | 0.95     | 0.05 | 0    | 2.4 (0.5-22)  |
| rs939461  | 48760415 | A/C                      | 0.87                  | 0.13 | 0    | 0.69     | 0.31 | 0    | 0.4 (0.1-0.9) |

\* X denotes major allele, y denotes minor allele.

† OR, odds ratio comparing carriers of the minor allele (Xy and yy) to subjects homozygous for the major allele (XX); CI, confidence interval.

**Supplemental Table 2:** *XRCC1* SNP description, genotypic frequencies, and association with ALS - GWAS

| SNP       | Position | Alleles<br>(major/minor) | Irish GWAS            |      |      |          |      |      |                          | NINDS GWAS            |      |      |          |      |      |               |
|-----------|----------|--------------------------|-----------------------|------|------|----------|------|------|--------------------------|-----------------------|------|------|----------|------|------|---------------|
|           |          |                          | Genotypic frequencies |      |      |          |      |      | OR (95% CI) <sup>†</sup> | Genotypic frequencies |      |      |          |      |      |               |
|           |          |                          | Cases                 |      |      | Controls |      |      |                          | Cases                 |      |      | Controls |      |      |               |
| XX        | Xy       | yy                       | XX                    | Xy   | yy   | XX       | Xy   | yy   | XX                       | Xy                    | yy   | XX   | Xy       | yy   |      |               |
| rs1799778 | 48750981 | G/T                      | 0.41                  | 0.46 | 0.13 | 0.44     | 0.44 | 0.12 | 1.1 (0.8-1.6)            | 0.42                  | 0.43 | 0.15 | 0.40     | 0.46 | 0.14 | 0.9 (0.6-1.3) |
| rs2854501 | 48751841 | C/T                      | 0.63                  | 0.30 | 0.07 | 0.61     | 0.32 | 0.07 | 0.9 (0.6-1.3)            | 0.67                  | 0.32 | 0.01 | 0.64     | 0.30 | 0.06 | 0.8 (0.6-1.2) |
| rs3213403 | 48758568 | A/G                      | 0.93                  | 0.07 | 0    | 0.90     | 0.10 | 0    | 0.7 (0.4-1.4)            | 0.88                  | 0.12 | 0    | 0.89     | 0.10 | 0.01 | 1.1 (0.6-1.8) |
| rs2854496 | 48760033 | G/A                      | 0.61                  | 0.36 | 0.03 | 0.57     | 0.39 | 0.04 | 0.8 (0.6-1.2)            | 0.65                  | 0.31 | 0.04 | 0.65     | 0.31 | 0.04 | 1.0 (0.7-1.4) |
| rs939461  | 48760415 | A/C                      | 0.78                  | 0.22 | 0    | 0.78     | 0.21 | 0.01 | 1.0 (0.6-1.6)            | 0.77                  | 0.22 | 0.01 | 0.85     | 0.15 | 0    | 1.6 (1.0-2.5) |
| rs3213287 | 48763248 | A/G                      | 0.91                  | 0.09 | 0    | 0.95     | 0.05 | 0    | 1.7 (0.8-3.7)            | 0.89                  | 0.11 | 0    | 0.92     | 0.08 | 0    | 1.4 (0.8-2.4) |
| rs3213255 | 48769347 | T/C                      | 0.36                  | 0.45 | 0.19 | 0.32     | 0.48 | 0.20 | 0.8 (0.6-1.2)            | 0.42                  | 0.43 | 0.15 | 0.37     | 0.44 | 0.19 | 0.8 (0.6-1.2) |
| rs2682585 | 48773128 | C/T                      | 0.67                  | 0.27 | 0.05 | 0.64     | 0.29 | 0.05 | 0.9 (0.6-1.4)            | 0.69                  | 0.29 | 0.02 | 0.68     | 0.26 | 0.06 | 0.9 (0.6-1.4) |
| rs2682587 | 48774269 | C/A                      | 0.61                  | 0.35 | 0.04 | 0.58     | 0.38 | 0.04 | 0.9 (0.6-1.3)            | 0.65                  | 0.31 | 0.04 | 0.63     | 0.33 | 0.04 | 0.9 (0.6-1.3) |
| rs184239  | 48775995 | T/C                      | 0.66                  | 0.28 | 0.06 | 0.65     | 0.31 | 0.04 | 0.9 (0.6-1.4)            | 0.70                  | 0.29 | 0.01 | 0.68     | 0.26 | 0.06 | 0.9 (0.6-1.3) |

\* X denotes major allele and y denotes minor allele; some frequencies do not round up to 100% due to missing or rounding.

† OR, odds ratio comparing carriers of the minor allele (Xy and yy) to subjects homozygous for the major allele (XX); CI, confidence interval.
